# Supplementary material for: Blocking Activin Receptor Ligands Is Not Sufficient to Rescue Cancer-Associated Gut Microbiota—A Role for Gut Microbial Flagellin in Colorectal Cancer and Cachexia?
Source: MDPI journal article supplement (doi:10.3390/cancers11111799), 2019-11-15
Supplement: s1 [file s1]

## Supplementary Files:

# Blocking Activin Receptor Ligands Is Not Sufficient to Rescue Cancer-Associated Gut Microbiota – A Role for Gut Microbial Flagellin in Colorectal Cancer and Cachexia?

Satu Pekkala, Anniina Keskitalo, Emilia Kettunen, Sanna Lensu, Noora Nykänen, Teijo Kuopio, Olli Ritvos, Jaakko Hentilä, Tuuli A. Nissinen and Juha J Hulmi

S1

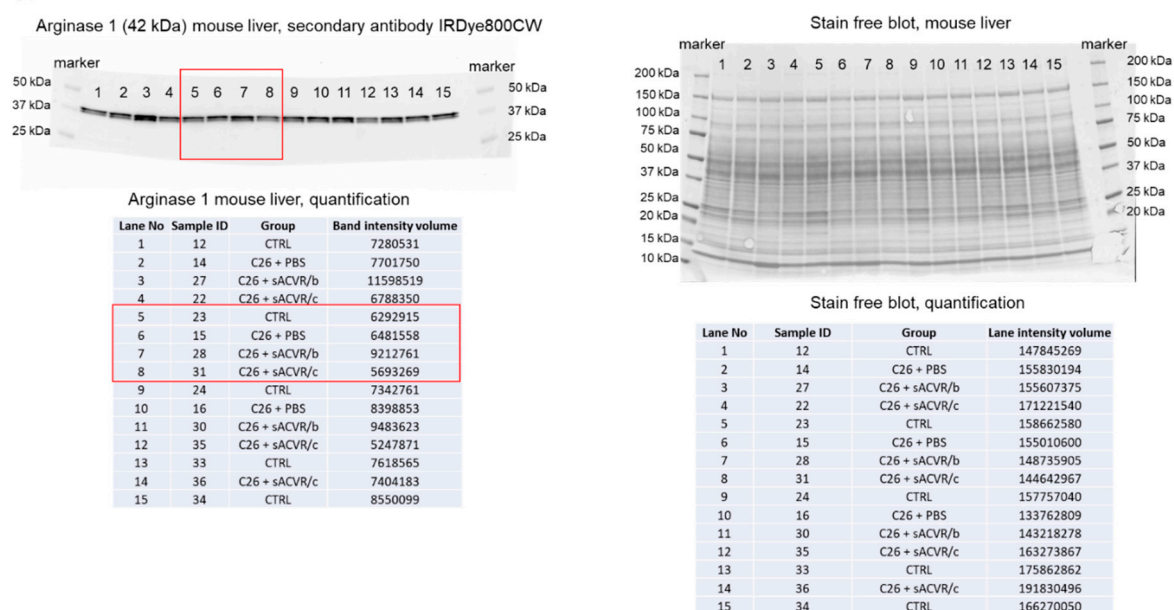

S1. The original blots that have been used to make Figure 9a, and their quantification with ChemiDoc MP Imaging System and software. As a marker, BioRad All Blue was used. The lanes used for Figure 9a are marked with surrounding red line.

**S2**Cd11b (120 kDa) human samples,  
secondary antibody IRDye800CW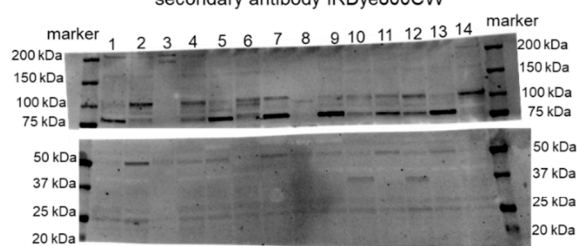Arginase 1 (42 kDa) human samples,  
secondary antibody IRDye800CW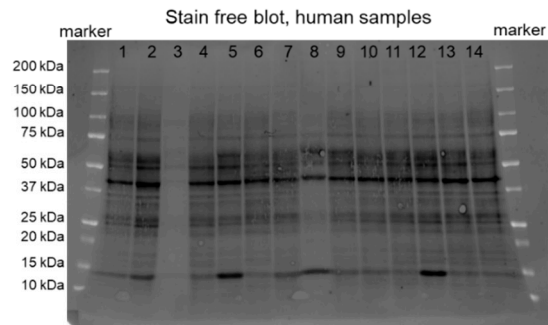Cd11b (120 kDa) human samples,  
secondary antibody IRDye800CW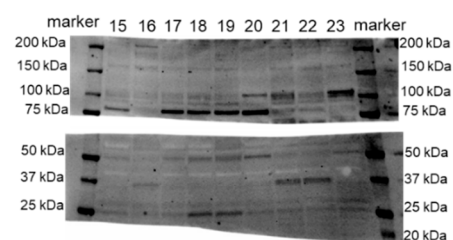Arginase 1 (42 kDa) human samples,  
secondary antibody IRDye800CW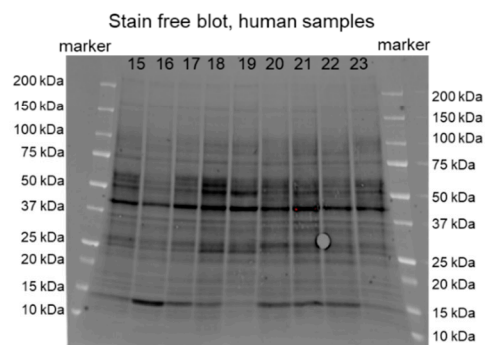

Cd11b, human samples, quantification

| Lane No | Sample ID | Sample type  | Band intensity volume |
|---------|-----------|--------------|-----------------------|
| 1       | 24        | healthy site | 45069                 |
| 2       | 24        | tumor        | 244989                |
| 3       | 29        | healthy site | 294                   |
| 4       | 29        | tumor        | 122255                |
| 5       | 31        | healthy site | 49073                 |
| 6       | 31        | tumor        | 108272                |
| 7       | 27        | healthy site | 110162                |
| 8       | 27        | tumor        | 244                   |
| 9       | 32        | healthy site | 49684                 |
| 10      | 32        | tumor        | 41140                 |
| 11      | 35        | healthy site | 57763                 |
| 12      | 35        | tumor        | 114560                |
| 13      | 36        | healthy site | 21183                 |
| 14      | 36        | tumor        | 204061                |
| 15      | 37        | healthy site | 28756                 |
| 16      | 37        | tumor        | 28049                 |
| 17      | 50        | healthy site | 27227                 |
| 18      | 50        | tumor        | 50843                 |
| 19      | 39        | healthy site | 11672                 |
| 20      | 12        | tumor        | 129915                |
| 21      | 31        | tumor        | 178496                |
| 22      | 15        | tumor        | 93052                 |
| 23      | 34        | tumor        | 414324                |

Arginase 1, human samples, quantification

| Lane No | Sample ID | Sample type  | Band intensity volume |
|---------|-----------|--------------|-----------------------|
| 1       | 24        | healthy site | -71694                |
| 2       | 24        | tumor        | 182670                |
| 3       | 29        | healthy site | -20916                |
| 4       | 29        | tumor        | -25417                |
| 5       | 31        | healthy site | 70378                 |
| 6       | 31        | tumor        | -121330               |
| 7       | 27        | healthy site | -152569               |
| 8       | 27        | tumor        | 104871                |
| 9       | 32        | healthy site | -66268                |
| 10      | 32        | tumor        | 1327754               |
| 11      | 35        | healthy site | -60086                |
| 12      | 35        | tumor        | 1533488               |
| 13      | 36        | healthy site | -7560                 |
| 14      | 36        | tumor        | -119406               |
| 15      | 37        | healthy site | 11686                 |
| 16      | 37        | tumor        | 1506804               |
| 17      | 50        | healthy site | 95398                 |
| 18      | 50        | tumor        | 178748                |
| 19      | 39        | healthy site | -48922                |
| 20      | 12        | tumor        | 350739                |
| 21      | 31        | tumor        | 3314165               |
| 22      | 15        | tumor        | 3373603               |
| 23      | 34        | tumor        | 430636                |

Stain free blot, human samples, quantification

| Lane No | Sample ID | Sample type  | Lane intensity volume |
|---------|-----------|--------------|-----------------------|
| 1       | 24        | healthy site | 220652218             |
| 2       | 24        | tumor        | 431873737             |
| 3       | 29        | healthy site | 45512989              |
| 4       | 29        | tumor        | 392854175             |
| 5       | 31        | healthy site | 341286857             |
| 6       | 31        | tumor        | 354136484             |
| 7       | 27        | healthy site | 277783350             |
| 8       | 27        | tumor        | 69677368              |
| 9       | 32        | healthy site | 263447236             |
| 10      | 32        | tumor        | 337963028             |
| 11      | 35        | healthy site | 339313664             |
| 12      | 35        | tumor        | 391597573             |
| 13      | 36        | healthy site | 351478168             |
| 14      | 36        | tumor        | 430181081             |
| 15      | 37        | healthy site | 228048537             |
| 16      | 37        | tumor        | 310930046             |
| 17      | 50        | healthy site | 293118055             |
| 18      | 50        | tumor        | 504953191             |
| 19      | 39        | healthy site | 312390913             |
| 20      | 12        | tumor        | 332518607             |
| 21      | 31        | tumor        | 512916363             |
| 22      | 15        | tumor        | 299649765             |
| 23      | 34        | tumor        | 186326291             |

S2. The original blots that have been used to make Figure 9b, and their quantification with ChemiDoc MP Imaging System and software. As a marker, BioRad All Blue was used.

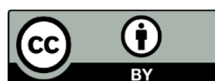

© 2019 by the authors. Licensee MDPI, Basel, Switzerland. This article is an open access article distributed under the terms and conditions of the Creative Commons Attribution (CC BY) license (<http://creativecommons.org/licenses/by/4.0/>).
